# Supplementary material for: Non-compulsory measures sufficiently reduced human mobility in Tokyo during the COVID-19 epidemic
Source: PubMed Central journal article supplement (PMC7581808; doi:10.1038/s41598-020-75033-5), 2020-10-22
Supplement: 41598_2020_75033_MOESM1_ESM.pdf [file 41598_2020_75033_MOESM1_ESM.pdf]

# Supplementary Material

## **Non-Compulsory Measures Sufficiently Reduced Human Mobility in Tokyo during the COVID-19 Epidemic**

**Takahiro Yabe, Kota Tsubouchi, Naoya Fujiwara, Takayuki Wada, Yoshihide Sekimoto, Satish Ukkusuri\***

\*sukkusur@purdue.edu

This Supplementary Material contains the following:

- Supplementary Tables S1 - S2
- Supplementary Figures S1 - S8

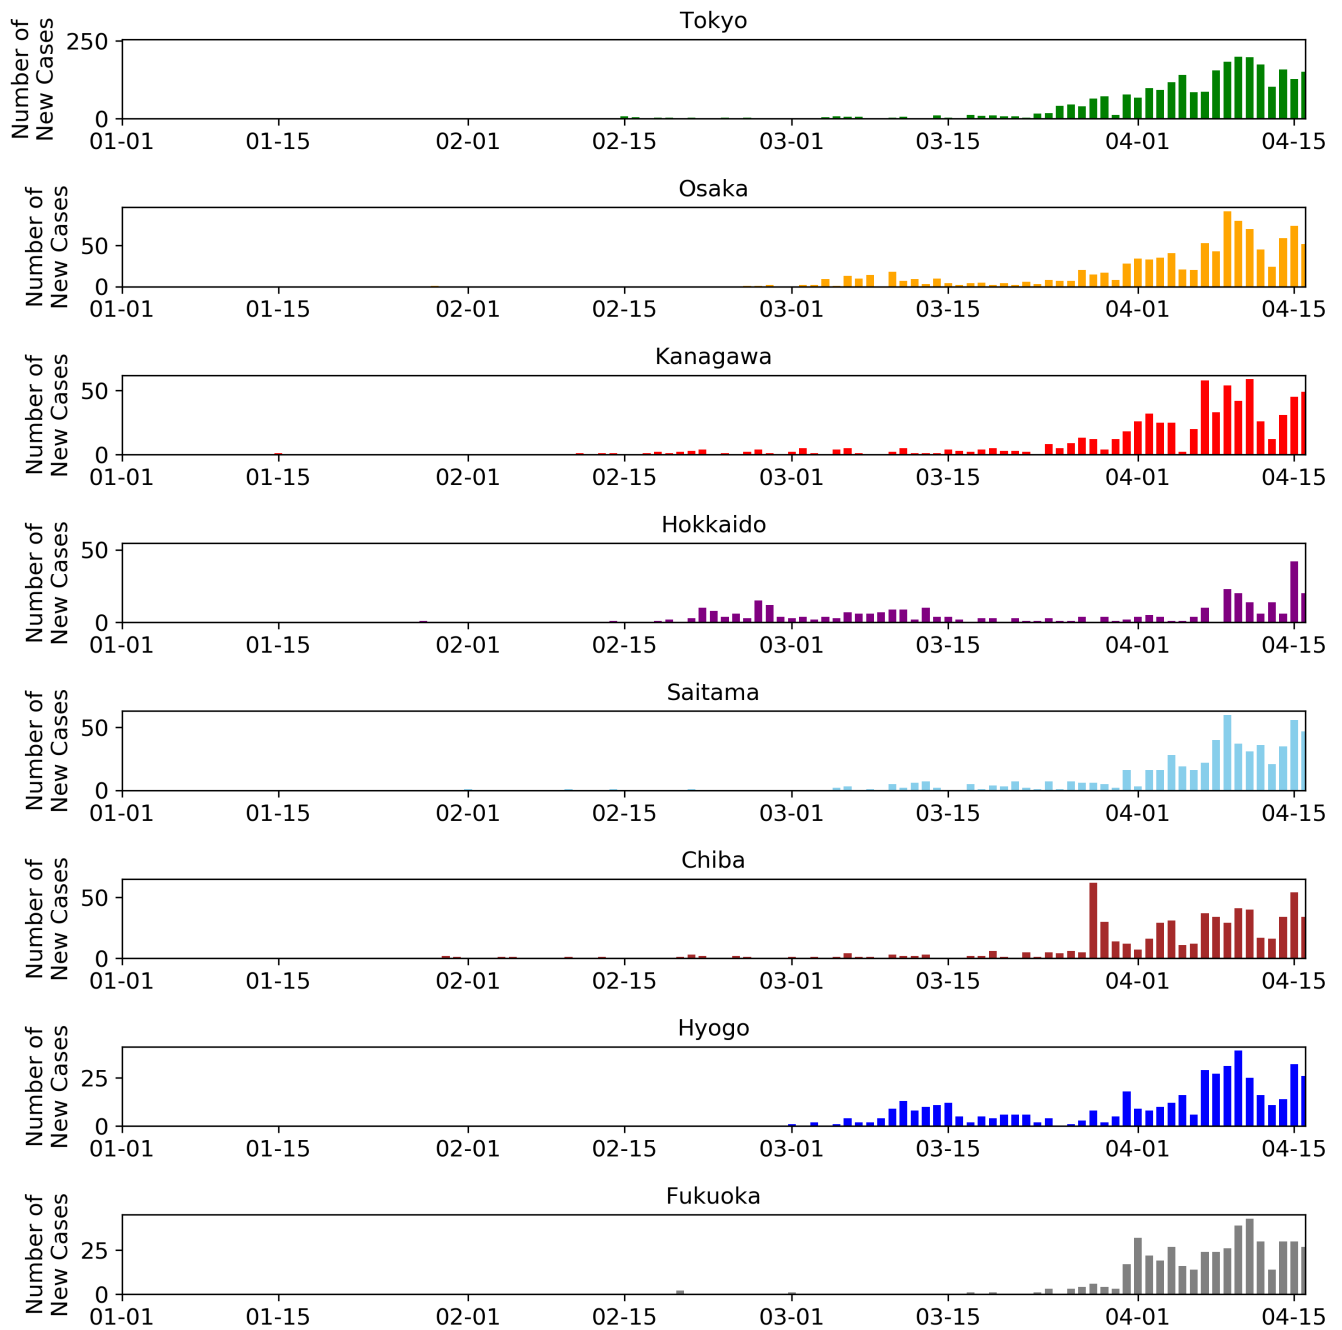

**Figure S1. Number of new COVID-19 cases in major cities in Japan.** For many of the cities in Japan, COVID-19 patients started to increase in the beginning of April.

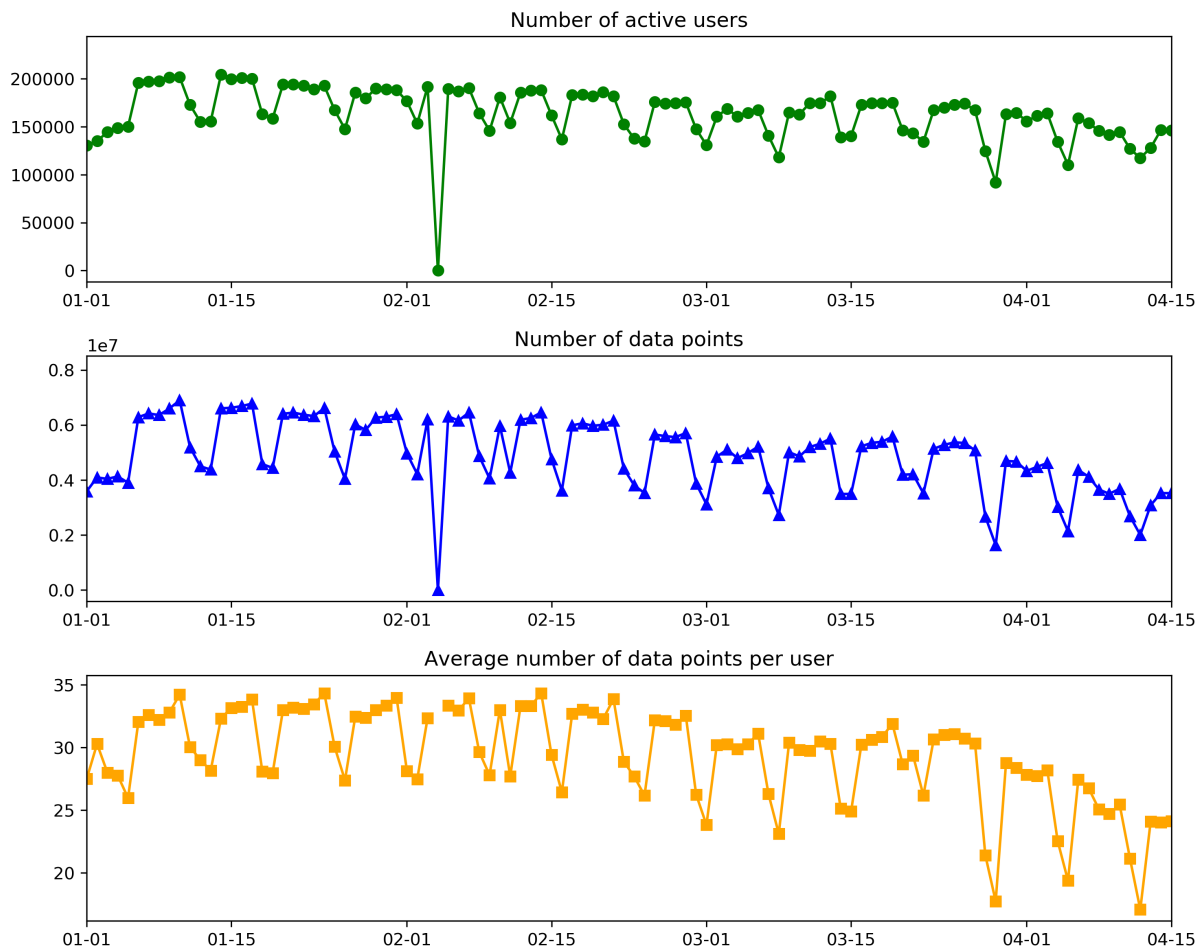

**Figure S2. Number of active IDs and total GPS observation points.** (Top) The number of active users slightly decrease as time passes, however stays stable for the time period. (B) Total number of GPS observations in the dataset. (C) Average number of data points per user decreases towards the end of March and in April since more users spend more time staying static.

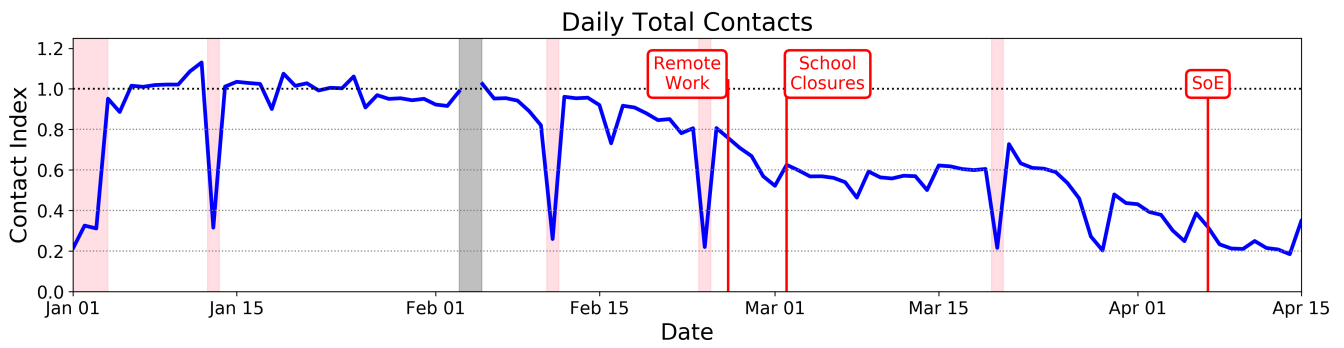

**Figure S3. Social contact index normalized with respect to day of week.** Averages of usual social contact index were computed by taking the average values on each day except January 13th, which was a holiday in Japan.

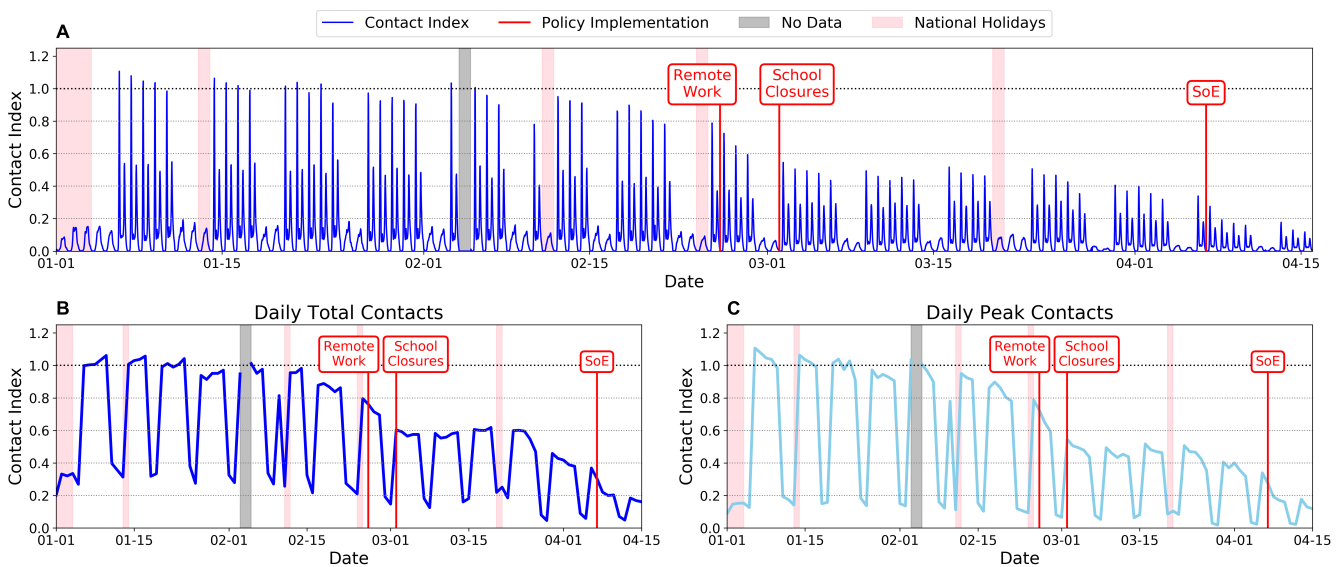

**Figure S4. Social contact index with spatial threshold of 250 meters.** (A) social contact index computed with the same method as Figure 3 (in main text), but with 250 meters as the spatial threshold. (B) and (C) show daily total and peak contacts. Regardless of the spatial threshold, the conclusion that more than 80% of the contacts were reduced stays consistent.

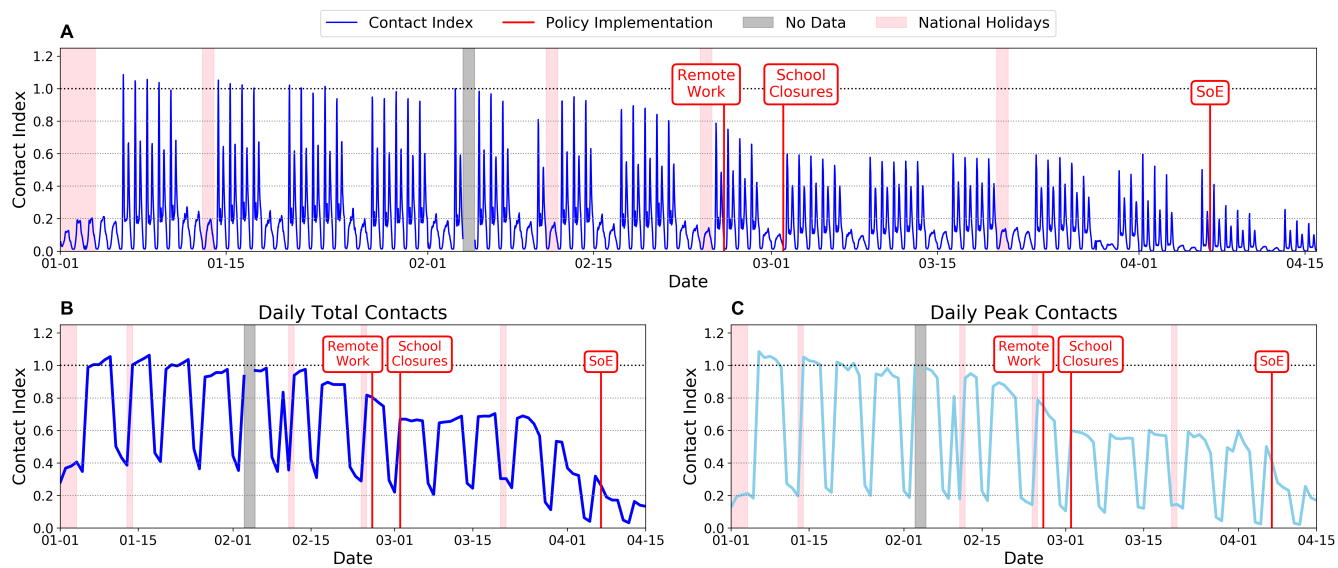

(a) Spatial threshold of 250 meters

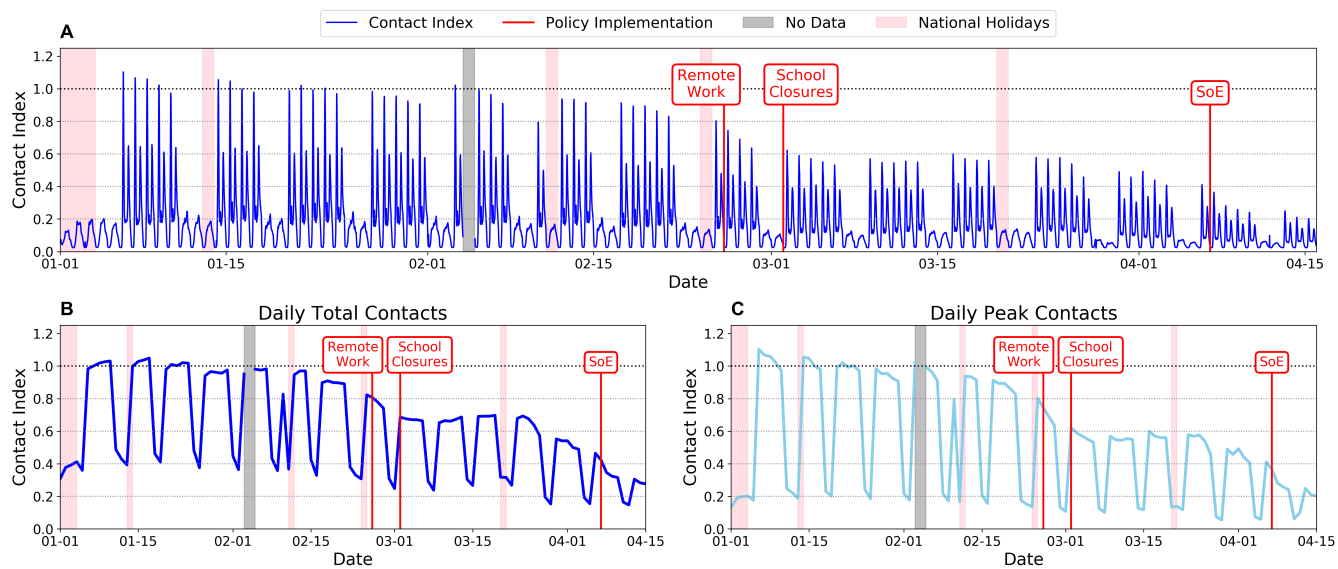

(b) Spatial threshold of 100 meters

**Figure S5. Social contact index when including the users who are staying home.**

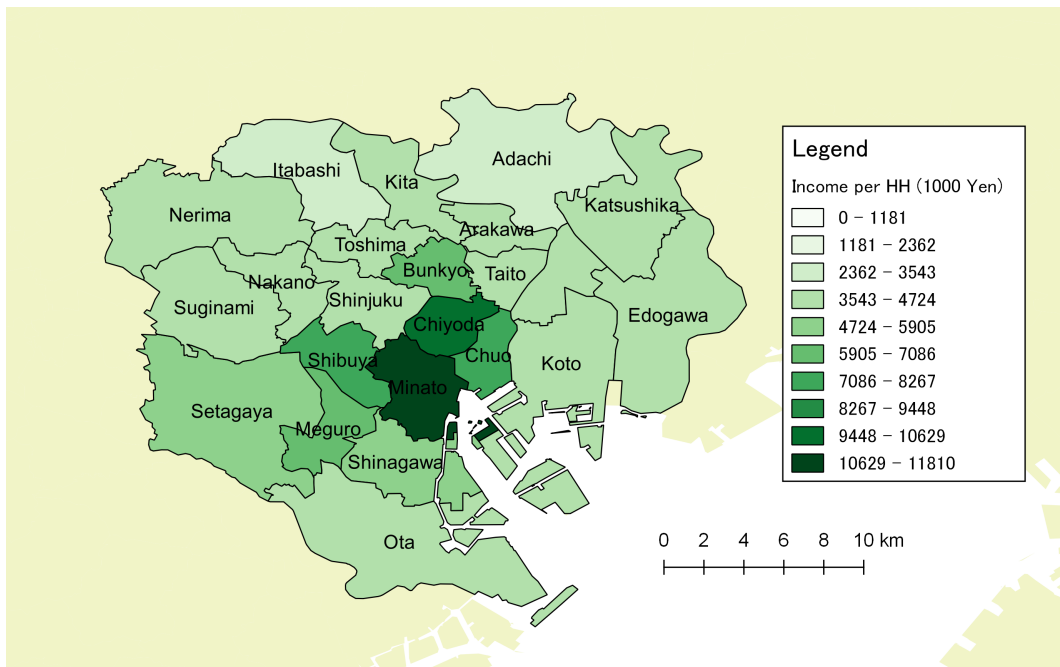

**Figure S6.** Spatial location of 23 wards in central Tokyo, and average household taxable income.

**Table S1.** Statistics showing the number of households and taxable income per household in all 23 wards in Tokyo.

| Name       | code  | Total Taxable Income | Households | Mean Taxable Income (Thousand Yen/household) |
|------------|-------|----------------------|------------|----------------------------------------------|
| Chiyoda    | 13101 | 333664476            | 33262      | 10031.4                                      |
| Chuo       | 13102 | 562306834            | 79272      | 7093.3                                       |
| Minato     | 13103 | 1541982291           | 130562     | 11810.3                                      |
| Shinjuku   | 13104 | 926402861            | 204989     | 4519.2                                       |
| Bunkyo     | 13105 | 718111843            | 120858     | 5941.7                                       |
| Taito      | 13106 | 433617929            | 112117     | 3867.5                                       |
| Sumida     | 13107 | 526774130            | 130862     | 4025.4                                       |
| Koto       | 13108 | 1123594742           | 243708     | 4610.4                                       |
| Shinagawa  | 13109 | 1011051510           | 212374     | 4760.7                                       |
| Meguro     | 13110 | 945905092            | 146162     | 6471.6                                       |
| Ota        | 13111 | 1648342738           | 371149     | 4441.1                                       |
| Setagaya   | 13112 | 2620976315           | 463632     | 5653.1                                       |
| Shibuya    | 13113 | 1029439108           | 135749     | 7583.4                                       |
| Nakano     | 13114 | 748424622            | 196132     | 3815.9                                       |
| Suginami   | 13115 | 1443707240           | 312001     | 4627.2                                       |
| Toshima    | 13116 | 663702757            | 176376     | 3762.9                                       |
| Kita       | 13117 | 658834551            | 178379     | 3693.4                                       |
| Arakawa    | 13118 | 381267820            | 103101     | 3698.0                                       |
| Itabashi   | 13119 | 1030999559           | 291408     | 3537.9                                       |
| Nerima     | 13120 | 1505429630           | 337987     | 4454.1                                       |
| Adachi     | 13121 | 1092439739           | 310662     | 3516.4                                       |
| Katsushika | 13122 | 761907030            | 201380     | 3783.4                                       |
| Edogawa    | 13123 | 1202944874           | 309072     | 3892.1                                       |

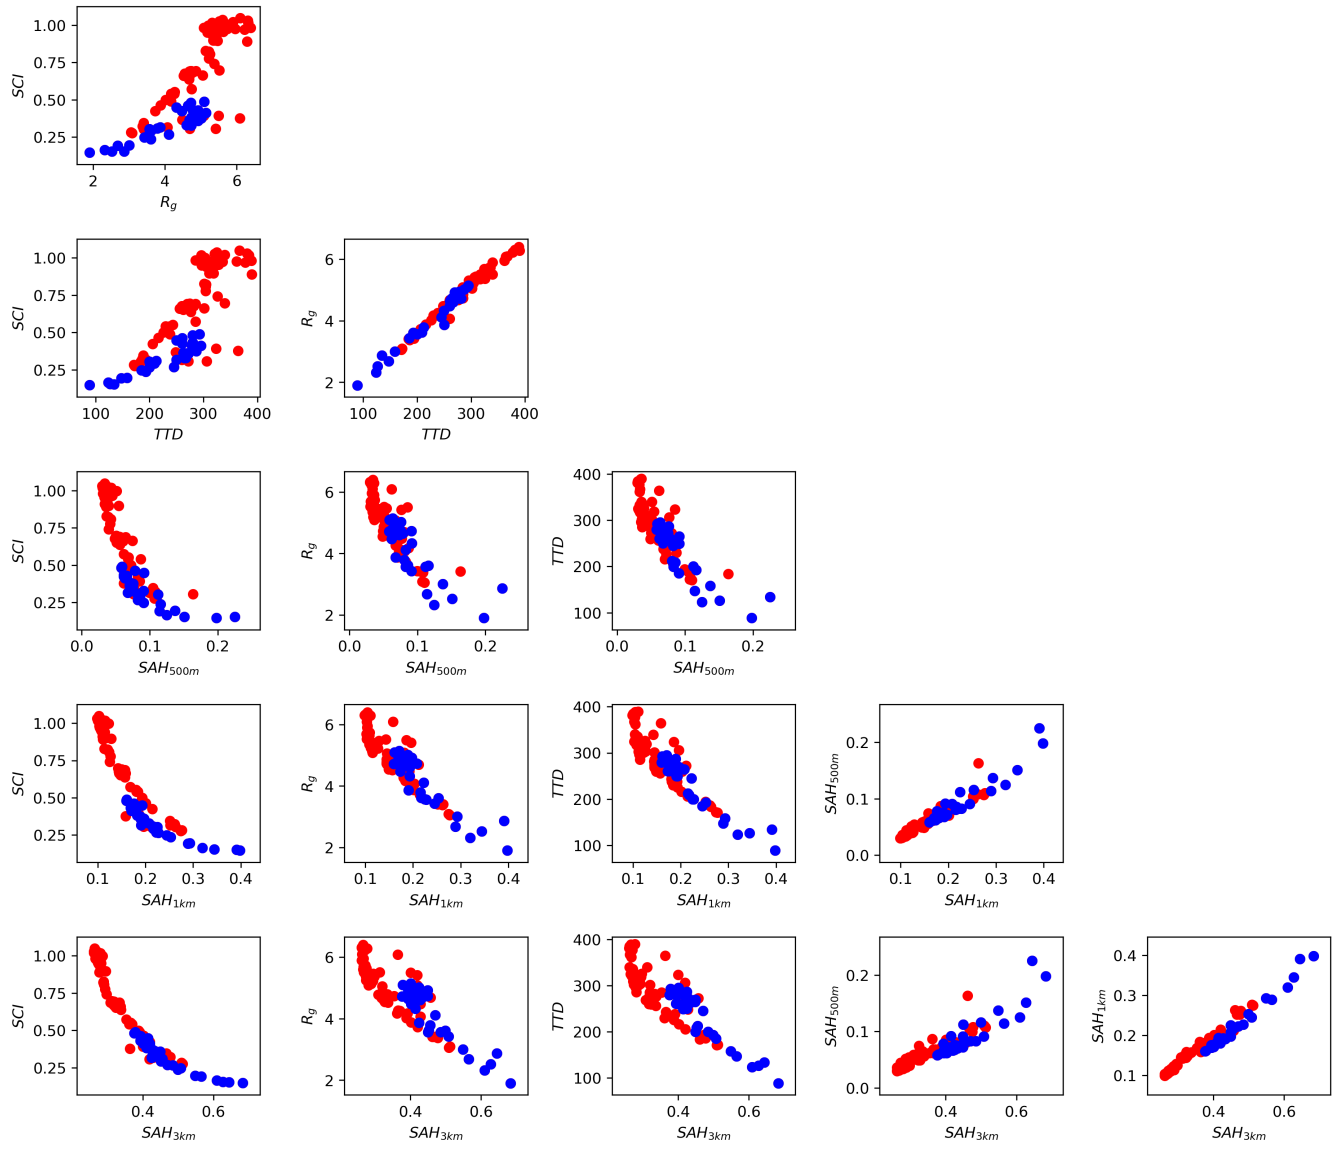

**Figure S7. Correlation between mobility metrics.** Red and blue scatter plots show the data points on weekdays and weekends, respectively.



**Table S2.** Location information of place of interests used in the analysis for Figure 4 and their types.

| Type               | Name                   | Location (longitude, latitude) | Main meshcode |
|--------------------|------------------------|--------------------------------|---------------|
| Business districts | Tokyo Midtown          | (139.73081589,35.66608288)     | 5339-3598-3   |
|                    | Roppongi Hills         | (139.72995758,35.66036471)     | 5339-3598-1   |
|                    | East Shinagawa         | (139.73868833,35.62842595)     | 5339-3559-1   |
|                    | West Shinjuku          | (139.69789982,35.68982286)     | 5339-4525-4   |
|                    | Toranomon Hills        | (139.74918365,35.66695452)     | 5339-4509-2   |
|                    | Kioicho                | (139.73716736, 35.67953989)    | 5339-4518-4   |
| Shopping areas     | Ginza                  | (139.76255138,35.67158177)     | 5339-4601-3   |
|                    | Omotesando             | (139.71174419,35.66523219)     | 5339-3596-4   |
|                    | Shibuya Center Street  | (139.69501934,35.65879283)     | 5339-3595-2   |
|                    | Shinjuku Golden Street | (139.70463753,35.69393568)     | 5339-4536-1   |
|                    | Akihabara Street       | (139.7715995,35.7007106)       | 5339-4641-2   |
|                    | Kagurazaka             | (139.73385577,35.70388258)     | 5339-4548-2   |
| Parks              | Shinjuku Gyoen         | (139.71004486,35.68518698)     | 5339-4526-2   |
|                    | Yoyogi Park            | (139.69665527,35.67159146)     | 5339-4505-4   |
|                    | Hamarikyu              | (139.76347446,35.65975451)     | 5339-3691-1   |
|                    | Ueno Park              | (139.77398872,35.71550708)     | 5339-4651-4   |
|                    | Shiba Park             | (139.74798203,35.65492509)     | 5339-3589-4   |
| Stations           | Shinjuku               | (139.7008754,35.68957156)      | 5339-4526-3   |
|                    | Shibuya                | (139.70186152,35.65800855)     | 5339-3586-3   |
|                    | Shinagawa              | (139.73868833,35.62842595)     | 5339-3559-1   |
|                    | Tokyo                  | (139.76641937,35.6812414)      | 5339-4611-3   |
|                    | Akihabara              | (139.77305991,35.6986063)      | 5339-4631-4   |
| Airport            | Haneda Airport         | (139.77973938,35.54954667)     | 5339-2652-3   |

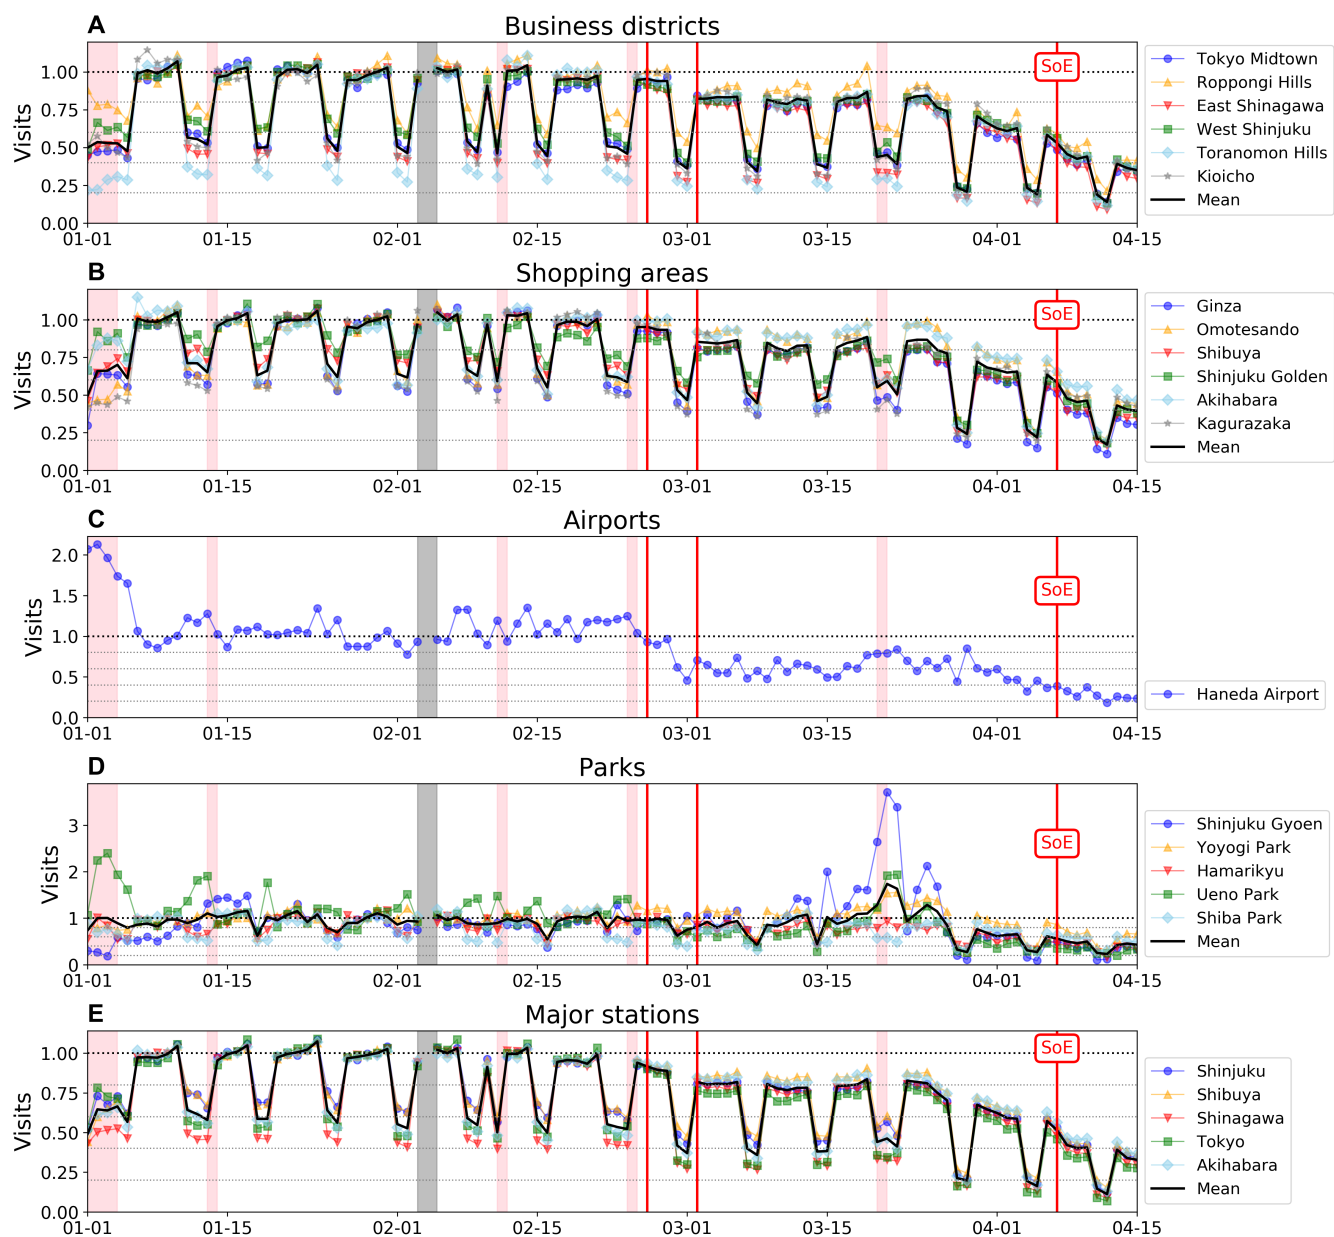

**Figure S8. Relative amount of visits to popular point-of-interests in Tokyo.** Amount of visits normalized by the weekdays in January for popular POIs are shown. (A) business districts, (B) shopping areas, (C) Haneda airport, (D) major parks, and (E) major stations.
